# Supplementary material for: Business English instruction: Empowering learners with the 4Cs of the 21st century
Source: Frontiers journal article supplement (doi:10.3389/feduc.2022.998987), 2022-08-26
Supplement: Data_Sheet_1.docx [file Data_Sheet_1.docx]

**The Questionnaires**

**Questionnaire-Part one- appropriateness level**

Please examine the formulated framework and rate the appropriateness of it in business English instructions.

1–absolutely inappropriate; 2-in appropriate; 3-slightly inappropriate

4-neutral; 5-slightly appropriate; 6-appropriate; 7- absolutely appropriate

1. How appropriate are the elements in the framework alongside the 21st century 4Cs?

1–absolutely inappropriate 2-in appropriate

3-slightly inappropriate 4-neutral

5-slightly appropriate 6-appropriate

7-absolutely appropriate

1. How appropriate are the objectives for approaching the 4Cs of the 21st century?

1–absolutely inappropriate 2-in appropriate

3-slightly inappropriate 4-neutral

5-slightly appropriate 6-appropriate

7-absolutely appropriate

1. How appropriate are the assessments that merged 21st century skills and business English tasks?

1–absolutely inappropriate 2-in appropriate

3-slightly inappropriate 4-neutral

5-slightly appropriate 6-appropriate

7-absolutely appropriate

1. How suitable is this framework for century skills’ integration to business English?

1–absolutely inappropriate 2- in appropriate

3-slightly inappropriate 4-neutral

5-slightly appropriate 6-appropriate

7-absolutely appropriate

**Questionnaire (Part 2): Effectiveness Level Perceived by Teachers**

A. Please rate the degree of effectiveness on instructive integration of the 21st century skills by checking the appropriate column in the table

| 4cs | Not effective (1) | Less effective (2) | Moderately  Effective  (3) | Effective  (4) | Very effective  (5) |
| --- | --- | --- | --- | --- | --- |
| Communication |  |  |  |  |  |
| Collaboration |  |  |  |  |  |
| Critical thinking |  |  |  |  |  |
| Creativity |  |  |  |  |  |

B. Feedback: What have you observed during the implementations of the given lessons?

__________________________________________________________________________________________________________________________________________________________________________________________________________________________________________________________________________________________________________________________________________________________________________________________________________________________________________________________________________________________________________________________________________________________________
